## Simultaneous multiplexed amplicon sequencing and transcriptome profiling in single cells

**Authors:** Mridusmita Saikia<sup>1,2,\*</sup>, Philip Burnham<sup>1,\*</sup>, Sara H. Keshavjee<sup>1</sup>, Michael F. Z. Wang<sup>1</sup>, Michael Heyang<sup>1</sup>, Pablo Moral-Lopez<sup>2</sup>, Meleana M. Hinchman<sup>2</sup>, Charles G. Danko<sup>2</sup>, John S. L. Parker<sup>2</sup>, Iwijn De Vlaminck<sup>1</sup>

\*These authors contributed equally

To whom correspondence should be addressed: [vlaminck@cornell.edu](mailto:vlaminck@cornell.edu)

### Affiliations:

<sup>1</sup>Meinig School of Biomedical Engineering, Cornell University, Ithaca, NY 14853, USA

<sup>2</sup>Baker Institute for Animal Health, College of Veterinary Medicine, Cornell University, Ithaca, NY 14853, USA

**Abstract:** Droplet microfluidics has made high-throughput single-cell RNA sequencing accessible to more laboratories than ever before, but is restricted to capturing information from the ends of A-tailed messenger RNA (mRNA) transcripts. Here, we describe a versatile technology, Droplet Assisted RNA Targeting by single cell sequencing (DART-seq), that surmounts this limitation allowing investigation of the polyadenylated transcriptome in single cells, as well as enriched measurement of targeted RNA loci, including loci within non-A-tailed transcripts. We applied DART-seq to simultaneously measure transcripts of the segmented dsRNA genome of a reovirus strain, and the transcriptome of the infected cell. In a second application, we used DART-seq to simultaneously measure natively paired, variable region heavy and light chain (VH:VL) amplicons and the transcriptome of human B lymphocyte cells.

## 1 INTRODUCTION

2  
3 High-throughput single-cell RNA-seq (scRNA-seq) is being widely adopted for  
4 phenotyping of cells in heterogeneous populations<sup>1-5</sup>. The most common  
5 implementations of this technology utilize droplet microfluidics to co-encapsulate single  
6 cells with beads that are modified with barcoded poly-dT oligos to enable capture of the  
7 polyadenylated 3' ends of RNA transcripts<sup>2,4,5</sup>. Although these approaches provide a  
8 means to perform inexpensive single-cell gene expression measurements at scale, they  
9 are limited to assaying the ends of mRNA transcripts. Therefore, they are ill-suited for the  
10 characterization of non-A-tailed RNA, including the transcripts of many RNA viruses. They  
11 are also uninformative of RNA segments that are located at a distance greater than a few  
12 hundred bases from transcript ends that often comprise essential functional information,  
13 for example the complementarity determining regions (CDRs) of immunoglobulins (B cell  
14 antibody)<sup>6</sup>.

15  
16 Here we report DART-seq, a method that combines enriched measurement of targeted  
17 RNA sequences, with unbiased profiling of the poly(A)-tailed transcriptome across  
18 thousands of single cells in the same biological sample. DART-seq achieves this by  
19 implementing a simple and inexpensive alteration of the Drop-seq strategy<sup>2</sup>. Barcoded  
20 primer beads that capture the poly(A)-tailed mRNA molecules in Drop-seq are  
21 enzymatically modified using a tunable ligation chemistry<sup>7</sup>. The resulting DART-seq  
22 primer beads are capable of priming reverse transcription of poly(A)-tailed transcripts as  
23 well as other RNA species of interest.

24  
25 DART-seq is easy to implement and enables a range of new biological measurements.  
26 Here, we explored two applications. We first applied DART-seq to profile viral-host  
27 interactions and viral genome dynamics in single cells. We implemented two distinct  
28 DART-seq designs to investigate murine L929 cells (L cells) infected by the reovirus strain  
29 Type 3 Dearing (T3D). We demonstrate the ability of DART-seq to profile all 10 non-A-  
30 tailed viral gene transcripts of T3D reovirus individually, as well as to recover a complete  
31 genome segment, while simultaneously providing access to the transcriptome of the  
32 infected L cells. In the second application, we applied DART-seq to determine natively  
33 paired antibody sequences of human B cells. DART-seq was able to determine B cell  
34 clonotype distribution, as well as variable heavy and light (VH:VL) pairings, in CD19  
35 positive B cell population, as well as in a mixed human peripheral blood mononuclear  
36 cells (PBMCs), highlighting the versatility of the approach.

37  
38  
39  
40

## 1 RESULTS

2

### 3 DART-seq primer bead synthesis

4

5 Droplet microfluidics based scRNA-seq approaches rely on co-encapsulation of single  
6 cells with barcoded primer beads that capture and prime reverse transcription of mRNA  
7 molecules expressed by the cell<sup>2,4</sup>. In Drop-seq, the primers on all beads comprise a  
8 common sequence used for PCR amplification, a bead-specific cell barcode, a unique  
9 molecular identifier (UMI), and a poly-dT sequence for capturing polyadenylated mRNAs  
10 and priming reverse transcription. To enable simultaneous measurement of the  
11 transcriptome and multiplexed RNA amplicons in DART-seq, we devised a scheme to  
12 enzymatically attach custom primers to a subset of poly-dTs on the Drop-seq bead (Fig.  
13 1a). This is achieved by annealing a double stranded toehold probe with a 3' ssDNA  
14 overhang that is complementary to the poly-dT sequence of the Drop-seq primers. The  
15 toehold is then ligated to the bead using T4 DNA ligase. Custom primers with a variety of  
16 different sequences can be attached to the same beads in a single reaction in this  
17 manner. The complementary toehold strand is removed after ligation.

18

19 We examined the efficiency, tunability and variability of the ligation reaction using  
20 fluorescence hybridization assays. Here, fluorescently labeled DNA hybridization probes  
21 were designed for complementarity to ligated primer sequences (Fig. 1b and  
22 Supplementary Fig. 1). We found that the fluorescence hybridization signal is directly  
23 proportional to the number of custom primers included in the ligation reaction (bulk  
24 experiment, 3000 beads per reaction, Fig. 1b). The probe ligation reaction is highly  
25 efficient (25-40%, Fig. 1b). This is true for a wide range of toehold concentrations, and for  
26 four different sequences tested, making the reaction highly tunable. The efficiency of  
27 probe ligation decreased for ligation reactions with more than  $10^{10}$  molecules per bead,  
28 indicating saturation of the available oligo(dT) primers on the Drop-seq beads. To  
29 examine bead-to-bead variability in the probe ligation reaction, we measured the  
30 fluorescence intensity for individual beads using an epifluorescence microscope. We  
31 found that the measured fluorescence signal after ligation is similar among beads (mean  
32 intensity of 28.2% compared to maximum pixel intensity, standard deviation 3.0%, n =  
33 741 beads; Fig. 1c).

34

35 After synthesis of DART-seq primer beads, DART-seq follows the Drop-seq workflow  
36 without modification (see Methods). Briefly, cells and barcoded primer beads are co-  
37 encapsulated in droplets using a microfluidic device. Cellular RNA is captured by the  
38 primer beads, and is reverse transcribed after breaking the droplets. The DART-seq  
39 beads prime reverse transcription of both A-tailed mRNA transcripts and RNA segments  
40 complementary to the custom primers ligated to the beads. The resulting complementary

1 DNA (cDNA) is PCR-amplified, randomly fragmented via tagmentation, and again PCR  
2 amplified to create libraries for sequencing. Sequences of mRNAs and RNA amplicons  
3 derived from the same cells are identified by decoding cell-specific barcodes, allowing for  
4 gene expression and amplicon measurements across individual cells.

5  
6 We assessed the efficiency of reverse transcription priming by DART-seq beads as  
7 function of the amount of custom primers ligated to the beads. We used quantitative PCR  
8 (qPCR) to measure the yield of cDNA copies of a non-A-tailed viral mRNA in reovirus-  
9 infected murine fibroblasts (Fig. 1d, bulk experiment, see methods). Two distinct custom  
10 primers were ligated to the beads, both targeting the T3D reovirus S2 segment. The yield  
11 of cDNA copies of viral mRNA, relative to cDNA copies of a host transcript (*Gapdh*),  
12 increased with increasing number of primers included in the bead-synthesis reaction, and  
13 saturated for bead synthesis reactions with more than  $10^9$  custom primers per bead (Fig.  
14 1d). Reverse transcription of *Gapdh* was not affected by the presence of custom primers  
15 on the beads, for beads prepared with up to  $10^{10}$  primers per bead in the ligation reaction.

16  
17 Next, we measured the abundance of amplicons in the resulting sequencing libraries  
18 using qPCR (Fig. 1e). Here, we compared sequencing libraries of T3D reovirus-infected  
19 L cells generated by Drop-seq and libraries for the same cells generated by DART-seq  
20 with amplicons targeting all ten genome segments of the virus. We designed seven PCR  
21 assays with 84-120 bp amplicons distributed across the L3 and S3 viral genome  
22 segments. To account for assay-to-assay and sample-to-sample variability, we  
23 normalized the number of molecules detected in Drop-seq and DART-seq libraries to the  
24 number of *Gapdh* transcripts. We observed significant enrichment upstream (5' end) of  
25 the custom primer ligation site for both the L3 and S3 segment (Fig. 1d). As expected,  
26 there was no enrichment downstream of the custom primer ligation site (3' end).  
27 Consistent with sequencing library preparation via tagmentation, we found that the degree  
28 of enrichment achieved by DART-seq at a given position decreased exponentially with  
29 distance from the target up to roughly 400 bp.

30

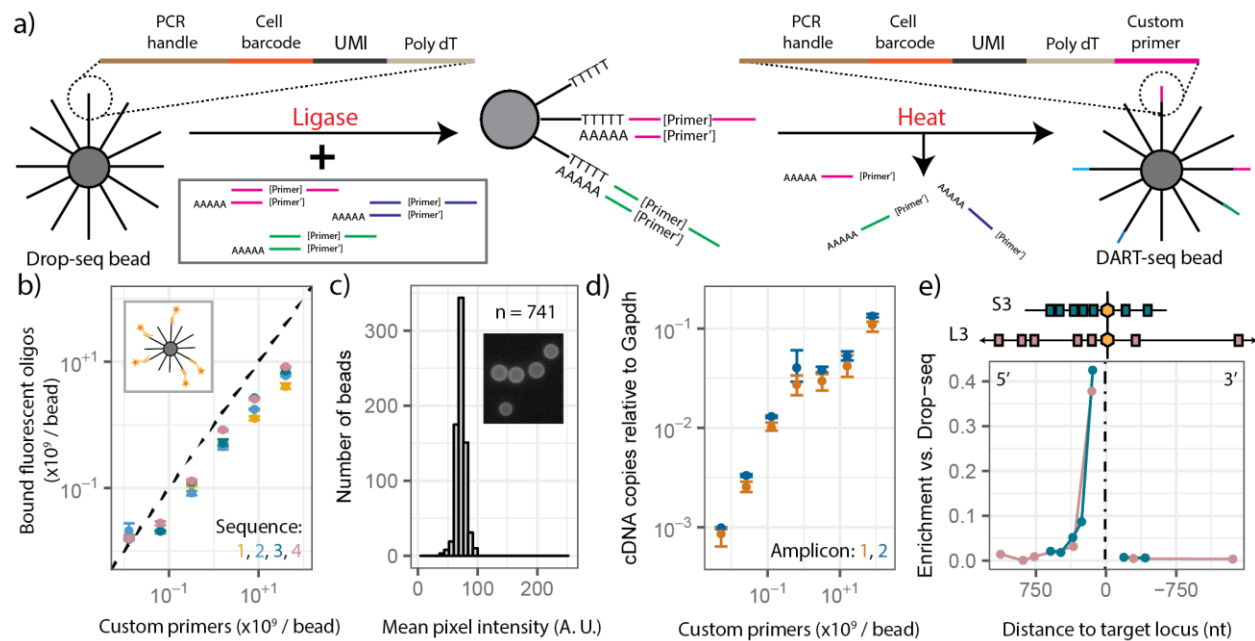

1  
2 **Fig. 1: DART-seq primer bead synthesis and validation of RNA priming.** (a) Protocol for converting  
3 Drop-seq primer beads (left) to DART-seq primer beads (right). (b) Number of fluorescence probes bound  
4 per bead as function of the number of primers per bead included in the ligation reaction (four distinct custom  
5 primer sequences). Points are mean for three replicate measurements, bars indicate the minimum and  
6 maximum. The dotted line indicates expected values for 100% ligation efficiency. Inset: Schematic of  
7 fluorescence hybridization assay. (c) Bead-to-bead variability in fluorescence pixel intensity (n = 741 beads,  
8 maximum pixel intensity is 255). Inset: representative fluorescence microscopy image of beads. (d) cDNA  
9 copies of reovirus RNA relative to *Gapdh* as function of the number of custom primers included in the  
10 ligation reaction (bulk experiment, 80000 cells, 12000 beads). Points are mean of three replicate  
11 measurements while error bars represent minimum and maximum of the three measurements. (e)  
12 Enrichment of PCR amplicons relative to *Gapdh* in DART-seq sequencing libraries versus Drop-seq  
13 libraries as function of distance to the target locus. Measurement for two reovirus genes (S3 in green and  
14 L3 in violet).

15  
16  
17  
18 **DART-seq enables investigation of the heterogeneity of cellular phenotypes and**  
19 **viral genotypes during viral infection.**

20  
21 The basic unit of RNA virus infection is the cell<sup>8</sup>. Only a small number of studies have  
22 evaluated the transcription and replication of RNA viruses within single cells<sup>9-12</sup>, and  
23 these studies relied on low throughput scRNA-seq technologies or scRNA-seq  
24 technologies that are unresponsive to non-polyadenylated viral RNAs. Here, we used  
25 DART-seq to examine infection of murine L cells with T3D reovirus. The reovirus  
26 polymerase transcribes non-A-tailed mRNAs from each of its 10 dsRNA genome  
27 segments<sup>13,14</sup>. We infected L cells at a multiplicity of infection of 10 (MOI 10), and allowed  
28 the virus to replicate for 15 hours after inoculation, creating a condition for which nearly

1 all cells are infected (Fig. 2a). We performed Drop-seq and DART-seq experiments on  
2 infected L cells and non-infected L cells as control. We implemented two distinct DART-  
3 seq designs. The first DART-seq design targeted each viral genome segment with a  
4 single amplicon. The second DART-seq design was comprised of seven amplicons  
5 targeting loci distributed evenly across the S2 genome segment (Fig. 2b).

6  
7 To determine the efficiency by which DART-seq retrieves viral transcripts near the target  
8 sequence, we analyzed the per-base coverage of positions upstream of the DART-seq  
9 target sites. For DART-seq design-1, we observed a mean enrichment of 34.7x in the  
10 gene regions 200 nt upstream of the ten custom primers. In both DART-seq design-1 and  
11 2, all targeted sites were enriched compared to standard Drop-seq beads (Fig. 2c,d). Viral  
12 transcripts were detected in Drop-seq libraries upstream of A-rich sequences in the viral  
13 genome, consistent with spurious priming of reverse transcription by poly-dT sequences  
14 on the oligo, as expected for Drop-seq. For example, a 200 nt gene segment upstream  
15 of an A<sub>5</sub> sequence on segment M3 (position 1952) was significantly enriched in the Drop-  
16 seq dataset (Fig. 2c; marked by arrow). Viral sequences were not detected in DART-seq  
17 or Drop-seq assays of non-infected cells.

18  
19 To test the utility of DART-seq to measure the heterogeneity of viral genotypes in single  
20 infected cells, we used DART-seq design-2 (Fig. 2b), which was tailored to retrieve the  
21 complete S2 viral gene segment. The S2 segment encodes inner capsid protein  $\sigma 2$ .  
22 Across cells with at least 1500 UMIs, DART-seq design-2 increased the mean coverage  
23 across the S2 segment 430-fold compared to Drop-seq (Fig. 2e), thereby enabling the  
24 investigation of the rate and pattern of mutations. 176 single-nucleotide variants (SNVs)  
25 were identified across the S2 segment (minor allele frequency greater than 10%, and per-  
26 base-coverage greater than 50x). Mutations from guanine-to-adenine (G-to-A) were most  
27 common (58%; Fig. 2f, top). We did not observe such a mutation pattern in a highly-  
28 expressed host transcript (*Actb*). We examined the mutation load of viral transcripts at  
29 the single cell level, and observed a wide distribution in mutation load, with a mean G-to-  
30 A conversion rate of 13%, and up to 41% (Fig. 2f, bottom). The reason for this level of  
31 hypermutation is unclear. G-to-A transamidation is an uncommon post-transcriptional  
32 modification that has not been previously seen as a host response to viral infection<sup>15,16</sup>.  
33 The high rate of G-to-A transition in the viral transcript could also be secondary to a defect  
34 in the fidelity of viral transcription. The T3D strain used in this study has strain-specific  
35 allelic variation in the viral polymerase co-factor,  $\mu 2$ , that has been shown to affect the  
36 capacity of  $\mu 2$  to associate with microtubules and the encapsidation of viral mRNAs within  
37 capsids<sup>17,18</sup>. To assess the reproducibility of DART-seq, we repeated these experiments  
38 on an independent sample; we observed similar patterns in the coverage tracks for the  
39 ten reovirus genome segments (Supplementary Fig. 2).

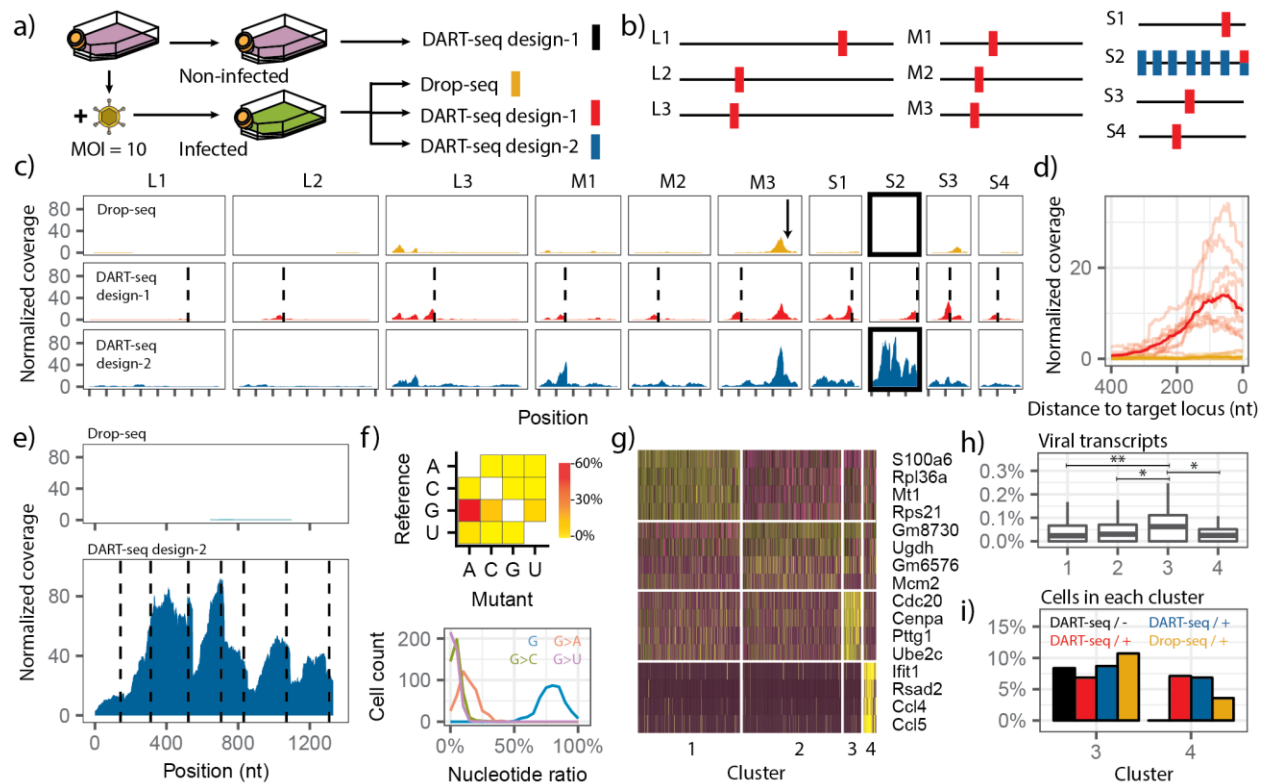

1  
 2 **Figure 2 - DART-seq reveals heterogeneity in viral genotypes and host response to infection.** (a)  
 3 Experimental design. Single cell analysis using Drop-seq and two distinct DART-seq designs of murine L  
 4 cells infected with a reovirus, and a non-infected control. (b) Schematic of two DART-seq designs. Design-  
 5 1 (red bars) targets all 10 reovirus gene segments (3 x L (Large), 3 x M (Medium), and 4 x S (Small)  
 6 segments). Design-2 (blue bars) targets seven loci on the S2 gene segment. (c) Comparison of the  
 7 sequence coverage (normalized to host UMI detected  $\times 10^6$ ) of the 10 reovirus gene segments (columns)  
 8 for three different library preparations (rows). The arrow indicates an A<sub>5</sub> pentanucleotide sequence part of  
 9 segment M3. Dotted lines indicate DART-seq target positions. (d) Per-base coverage upstream (5' end) of  
 10 10 custom primers of DART-seq design-1 (light red, average shown in dark red), and mean coverage  
 11 achieved with Drop-seq (yellow). (e) Per-base coverage of the S2 gene segment achieved with DART-seq  
 12 design-2 (bottom, dashed lines indicate custom primer positions) and Drop-seq (top). (f) Frequency and  
 13 pattern of base mutations. Across all cells, the average nucleotide profile for positions on the S2 segment  
 14 with SNPs such that the major allele is < 90% are shown (top); the distribution of nucleotide ratios for  
 15 positions with reference nucleotide G is depicted for single cells (bottom). (g) Clustering analysis of reovirus  
 16 infected L cells (DART-seq design-1). Hierarchical clustering of clusters displayed as a heatmap  
 17 (yellow/purple is higher/lower expression). (h) Relative abundance of viral transcripts in L-cell clusters (\*  
 18 and \*\* indicates significant *p*-value of  $10^{-3}$  and  $10^{-4}$ , respectively). (i) Fraction of cells in meta-clusters  
 19 for four experiments depicted in panel a with assay type and infection status (+ or -) indicated.

20  
 21 To identify distinct host cell populations based on patterns of gene expression, we  
 22 performed dimensional reduction and unsupervised clustering using approaches  
 23 implemented in Seurat<sup>19</sup>. We identified four distinct cell clusters for the monoculture  
 24 infection model (DART-seq design-1, Fig. 2g). Two major clusters comprised of cells with  
 25 elevated expression of genes related to transcription and replication (*Rpl36a*, cluster 1)  
 26 and metabolic pathways (*Ugdh*, cluster 2). Two additional clusters were defined by the

1 upregulation of genes related to mitotic function (*Cdc20*, *Cenpa*; cluster 3) and innate  
2 immunity (*Ifit1*, *Rsad2*; cluster 4), respectively (Fig. 2g). The abundance of viral gene  
3 transcripts relative to host transcripts was significantly elevated for cells in cluster 3 ( $n =$   
4 69 of 927 total cells) compared to cells in all other clusters (Fig. 2h; two-tailed Mann  
5 Whitney U test,  $p = 1.0 \times 10^{-4}$ ). We merged datasets for the Drop-seq and three DART-seq  
6 assays and quantified the cell type composition for each experiment. We did not observe  
7 cells related to cluster 4 (immune response) for the non-infected control, though cells in  
8 this state were observed in the other three datasets, as expected (Fig 2i). Together, these  
9 results support the utility of DART-seq to study the single cell heterogeneity in viral  
10 genotypes and cellular phenotypes during viral infection.

### 11 12 **DART-seq allows high-throughput paired repertoire sequencing of B lymphocytes**

13  
14 As a second application of DART-seq, we explored the biological corollary of viral  
15 infection, the cellular immune response. The adaptive immune response is reliant upon  
16 the generation of a highly diverse repertoire of B lymphocyte antigen receptors (BCRs),  
17 the membrane-bound form of antibodies expressed on the surface of B cells, as well as  
18 antibodies secreted by plasmablasts<sup>20,21</sup>. Antibodies are comprised of heavy ( $\mu$ ,  $\alpha$ ,  $\gamma$ ,  $\delta$ ,  
19  $\epsilon$ ) and light chains ( $\kappa$ ,  $\lambda$ ), linked by disulfide bonds (Fig. 3a). Each chain contains variable  
20 and constant domains. The variable region of the heavy chain is comprised of variable  
21 (V), diversity (D) and joining (J) segments, whereas the variable region of the light chain  
22 consists of a V and J segment (Fig. 3a). We designed DART-seq to target the site where  
23 the constant domain is joined to the VDJ gene segment in both heavy and light chain  
24 loci<sup>22</sup> (Fig. 3a). This design allows us to investigate the complementarity-determining  
25 region 3 (CDR3), which plays a key role in antigen binding. This region often goes  
26 undetected in regular scRNA-seq methods due to its distance from the 3' end of the  
27 transcript (Fig. 3a).

28  
29 As a first test of concept, we examined the efficiency of reverse transcription of heavy  
30 and light chain transcripts by DART-seq primer beads. We created several sets of primer  
31 beads, each with eight constant region custom primers ligated at varying total  
32 concentration. cDNA derived from pure CD19+ B cells for each primer bead set was then  
33 analyzed using qPCR. We observed an increase in the enrichment of transcripts for all  
34 heavy and light chain isotypes tested, as the number of custom primers on the beads was  
35 increased (Fig. 3b).

36  
37 Next, we compared the performance of DART-seq and Drop-seq to describe the antibody  
38 repertoire in CD19+ B cells at single cell level (Fig. 3c). Approximately 120,000 B cells  
39 were loaded in each reaction, yielding 4909 and 4965 single-cell transcriptomes for  
40 DART-seq and Drop-seq, respectively. The number of UMIs and genes detected per cell



1 was similar for DART-seq and Drop-seq (Supplementary Fig. 3). We mapped transcript  
2 sequences obtained from these cells to the immunoglobulin (Ig) sequence database, to  
3 find matches for the heavy and light chain transcripts in these cells, using MiXCR 2.1.5<sup>23</sup>.  
4 For both DART-seq and Drop-seq, the percentage of cells for which Ig transcript  
5 sequences were detected was directly correlated to the total number of unique transcripts  
6 detected in the cells (Fig. 3c). For cells with 1000-1200 UMI in the DART-seq assay, we  
7 identified either a heavy or a light chain transcript in at least 67% of B cells, and in 29%  
8 of B cells both the light and heavy chain transcripts were identified (Fig. 3c, top). In  
9 contrast, in the same UMI range, Drop-seq identified either a heavy or light chain  
10 transcript in only 35% of cells, and both heavy and light chain transcripts in only 3% of B  
11 cells (Fig. 3c, bottom).

12  
13 To test the ability of DART-seq to delineate immune repertoires from a mixed population  
14 of cells, we further applied DART-seq to study the B cell antibody repertoire in human  
15 PBMCs. We loaded 120,000 PBMCs in the DART-seq reaction, yielding 4997 single-cell  
16 transcriptomes. To identify the population of B cells within PBMCs, we used dimensional  
17 reduction and clustering approaches implemented in Seurat<sup>19</sup>. We identified Ig transcripts  
18 in 564 cells out of 818 cells in the B cell cluster, Ig expression mapped accurately onto  
19 the B cell population (visualized by t-distributed Stochastic Neighbor Embedding<sup>24</sup>, tSNE,  
20 Fig. 3d).

21  
22 In line with the pure B cell experiment, we observed a correlation between the recovery  
23 of Ig transcripts and the number of UMIs recorded in a cell (Supplementary Fig. 4). Also  
24 here, DART-seq outperforms Drop-seq in the recovery of antibody transcripts for B cells  
25 (PBMC-1, Supplementary Fig. 4). To test the reproducibility of DART-seq, we assayed  
26 an additional PBMC sample and observed similar Ig transcript recovery rates (PBMC-2,  
27 Supplementary Fig. 4). We further classified the B cells derived from the PBMCs into  
28 CD27(+) B cells based on the recovery of CD27. We performed isotype distribution  
29 analysis on these cells (Fig. 3d). CD27(+) B cells consists of either IgM+ or class switched  
30 mature memory cells<sup>25</sup>. As expected we saw a mixed population of heavy chain isotypes  
31 in these cells, with the highest frequency of IgM, followed by IgD and IgA (Fig. 3e). Among  
32 the light chain isotypes, kappa and lambda were equally represented, as expected<sup>26-28</sup>  
33 (Fig. 3e). The B cells in which we did not detect the CD27 marker were predominantly  
34 IgM isotype<sup>29</sup> (Fig. 3e). B cells derive their repertoire diversity from the variable regions  
35 of their heavy (IGHV) and light chains<sup>30</sup> (IGKV, IGLV). We measured the representation  
36 of variable isoforms captured by DART-seq and present the diversity of these isoforms in  
37 Supplementary Figure 5.

38  
39 Another significant feature of DART-seq is the capability to sequence the paired variable  
40 heavy and light chain transcripts in single cells. Out of the 564 cells for which we detected

1 Ig transcripts, we were able to map the complete CDR3L (V+D+C region) in 339 cells and  
 2 the complete CDR3H (V+D+J+C region) in 236 cells. The entire CDR3L as well CDR3H  
 3 region was detected in 120 B cells. We mapped the CDR3 length distribution, and found  
 4 that the CDR3L length peaks around 30 nucleotides while the CDR3H length distribution  
 5 peaks around 50 nucleotides, in agreement with previous reports<sup>22,31,32</sup> (Fig. 3f). We also  
 6 examined the incidence of promiscuous light chain pairing (pairing of light chains to two  
 7 or more VH sequences), and found that for CD27  
 8 (-) B cells, promiscuous CDR-L3 junctions comprised 73.5% of the repertoires, which is  
 9 in close agreement with a previous observation<sup>31</sup>.

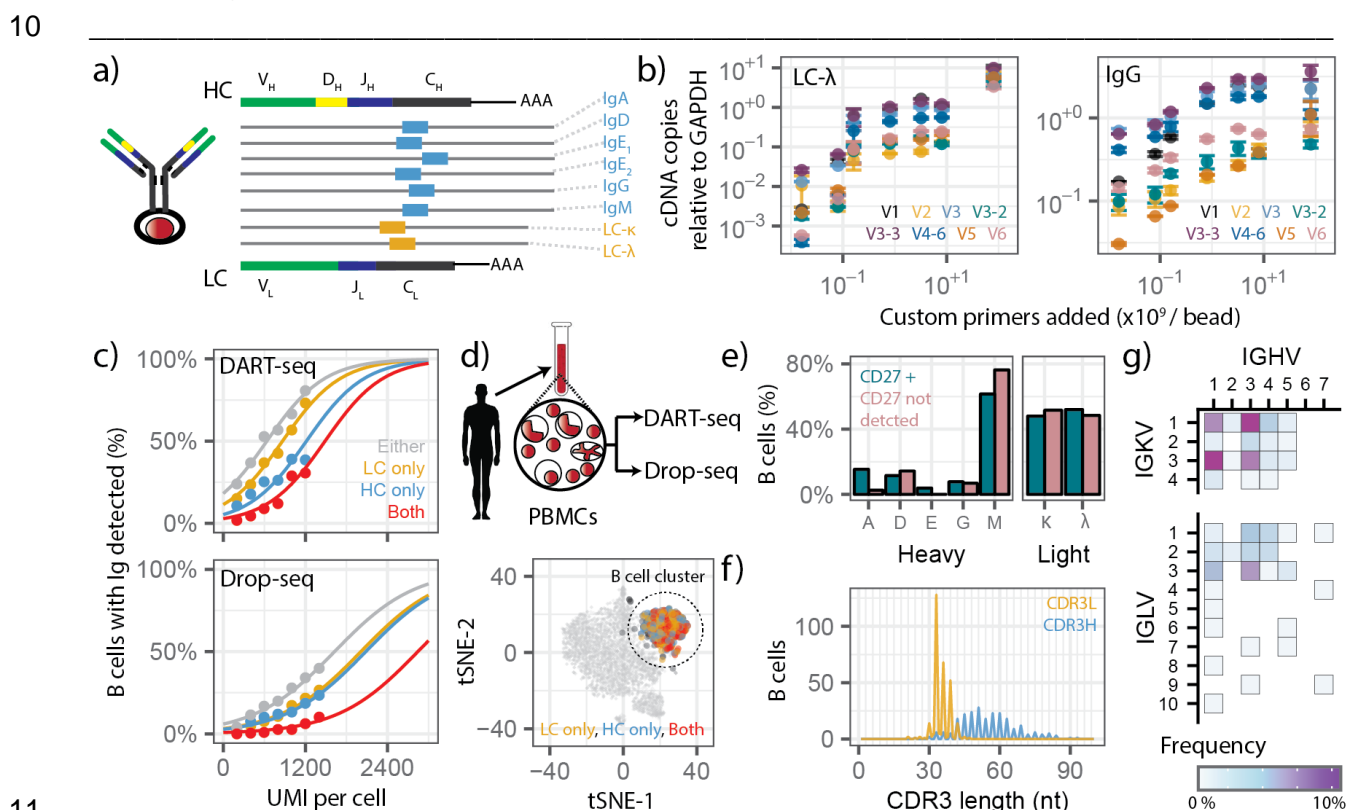

**Fig. 3 DART-seq measures paired heavy and light chain B cell transcripts at single cell resolution.**

(a) DART-seq beads comprise of probes that target the constant region of all human heavy and light immunoglobulins. (b) cDNA copies of Ig transcripts relative to *GAPDH* as a function of the number of custom primers included in the ligation reaction (left panel, LC $\lambda$ +V primers; right panel: IgG+V primers, cDNA derived from bulk DART-seq experiment, 62500 cells, 12000 beads). Points are mean of two replicate measurements, bars indicate the minimum and the maximum. (c) Percentage of B cells for which heavy and/or light chain transcripts were detected as a function of the UMI count per cell. Cells were binned by the number of UMI detected (bin width 200 UMI, 0-2400 UMI per cell, bins with fewer than 20 cells omitted, 26 - 2396 cells per bin). Distributions were fit with a sigmoid curve (Methods). (d) Drop-seq and DART-seq assays of human PBMCs. Representation of DART-seq single-cell transcriptomes on a tSNE, cells are colored based on heavy and/or light chain transcript detection. (e) Bar graph of isotype distribution for CD27(+) B cells and B cells in which CD27 transcripts were not detected. (f) CDR3L and CDR3H length distribution. 818 B cells were used for the analysis. (g) Paired heavy (IGHV) and light (IGKV and IGLV) variable chain usage in B cells, pairing data from 164 single cells was used to generate this collective plot.

1 Finally, we measured clone specific paired usage for the heavy variable regions (IGHV)  
2 and light variable regions (IGKV, IGLV) in 164 single B cells (Fig. 3g). The highest pairing  
3 frequency was observed between the most highly expressed heavy and light chain  
4 transcripts. This trend for preferred pairings in single cells was similar to previous  
5 reports<sup>21,33</sup>.

## 7 **DISCUSSION**

8  
9 We have presented an easy-to-implement, high-throughput scRNA-seq technology that  
10 overcomes the limitation of 3' end focused transcriptome measurements. DART-seq  
11 allows assaying additional RNA types in single cells while maintaining the ability to  
12 perform single-cell transcriptome profiling. This is achieved with a straightforward and  
13 inexpensive ligation assay to adapt the primer beads used in Drop-seq (Fig. 1). The  
14 additional assay time required to implement DART-seq compared to Drop-seq is minimal  
15 (2 hours), as is the cost per experimental design (~ \$100 per experiment). DART-seq is  
16 compatible with simultaneous querying of many amplicons. Here, we present example  
17 designs with 7-10 amplicons. The design and ratio of probes can be tailored to individual  
18 applications, allowing researchers the flexibility to use their existing droplet microfluidics  
19 scRNA-seq set-up for a wide variety of biological measurements.

20  
21 We have highlighted two potential applications of DART-seq technology. First, we  
22 demonstrated that DART-seq provides a means to study the heterogeneity in viral  
23 genotypes and cellular phenotypes during viral infection. We were able to recapitulate a  
24 full segment of a dsRNA viral genome, while simultaneously profiling the transcriptome  
25 of the infected host cells (Fig. 2). DART-seq opens new avenues for studies of host-virus  
26 interactions.

27  
28 We further applied DART-seq to measure endogenously paired, heavy and light chain  
29 amplicons within the transcriptome of human B lymphocyte cells in a mixed human PBMC  
30 population, while having access to transcriptome data of the B cells and all other cell  
31 types (Fig. 3). Determination of the paired antibody repertoire at depth can provide  
32 insights into several medically and immunologically relevant issues, including vaccine  
33 design and deployment<sup>34-37</sup>.

34  
35 While we focus here on DART-seq assays that combine transcriptome profiling and  
36 targeted amplicon sequencing, assays that focus the sequencing budget to a few targets  
37 of interest can also be envisioned. This can be achieved by saturating Drop-seq beads  
38 with modified primers, or by using primer beads that lack poly(dT) primers but have a  
39 common 3' end sequence suitable for custom primer ligation.

40

## 1    **METHODS**

2

3    **Step-by-step protocol.** A detailed step-by-step protocol, including all reagents and  
4 primers used, is included as a supplemental file.

5    **Primer bead synthesis.** Single-stranded DNA (ssDNA) primer sequences were  
6 designed to complement regions of interest. The probes were annealed to the  
7 complementary splint sequences that also carry a 10-12 bp overhang of A-repeats  
8 (Supplementary table). All oligos were resuspended in Tris-EDTA (TE) buffer at a  
9 concentration of 500  $\mu$ M. Double-stranded toehold adapters were created by heating  
10 equal volumes (20  $\mu$ L) of the custom primer and splint oligos in the presence of 50 mM  
11 NaCl. The reaction mixture was heated to 95 °C and cooled to 14 °C at a slow rate (-0.1  
12 °C/s). The annealed mixture of dsDNA probes was diluted with TE buffer to obtain a final  
13 concentration of 100  $\mu$ M. Equal amounts of custom primer probes were mixed and the  
14 final mixture diluted to obtain the desired probe concentration ( $8.03 \times 10^8$  custom primers  
15 per bead for reovirus DART-seq design-1 and B-cell DART-seq, and  $4.01 \times 10^9$  custom  
16 primers for reovirus DART-seq design-2). 16  $\mu$ L of this pooled probe mixture was  
17 combined with 40  $\mu$ L of PEG-4000 (50% w/v), 40  $\mu$ L of T4 DNA ligase buffer, 72  $\mu$ L of  
18 water, and 2  $\mu$ L of T4 DNA Ligase (30 U/ $\mu$ L, Thermo Fisher). Roughly 12,000 beads were  
19 combined with the above ligation mix and incubated for 1 hr at 37 °C (15 second  
20 alternative mixing at 1800 rpm). After ligation, enzyme activity was inhibited (65 °C for 3  
21 minutes) and beads were quenched in ice water. To obtain the desired quantity of DART-  
22 seq primer beads, 6-10 bead ligation reactions were performed in parallel. All reactions  
23 were pooled, and beads were washed once with 250  $\mu$ L Tris-EDTA Sodium dodecyl  
24 sulfate (TE-SDS) buffer, and twice with Tris-EDTA-Tween 20 (TE-TW) buffer. DART-seq  
25 primer beads were stored in TE-TW at 4 °C.

26    **Cell preparation.** Murine L929 cells (L cells) in suspension culture were infected with  
27 recombinant Type 3 Dearing reovirus at MOI 10. After 15 hours of infection, the cells were  
28 centrifuged at 600 x g for 10 minutes and resuspended in PBS containing 0.01% BSA.  
29 Two additional washes were followed by centrifugation at 600 x g for 8 min, and then  
30 resuspended in the same buffer to a final concentration of 300,000 cells/mL (120,000  
31 cells/mL in replicate experiment). Human CD19(+) B cells or PBMCs were obtained from  
32 Zen-Bio (B cells: SER-CD19-F, PBMCs: SER-PBMC-F). Cells were washed three times  
33 with PBS containing 0.01% BSA, each wash followed by centrifugation at 1500 rpm for 5  
34 min, and then resuspended in the same buffer. The cell suspension was filtered through  
35 a 40  $\mu$ m filter and resuspended to a final concentration of 120,000 cells/mL.

36    **Single cell library preparation.** Single cell library preparation was carried out as  
37 described<sup>2</sup>. Briefly, single cells were encapsulated with beads in a droplet using a  
38 microfluidics device (FlowJEM, Toronto, Ontario). After cell lysis, cDNA synthesis was  
39 carried out (Maxima Reverse Transcriptase, Thermo Fisher), followed by PCR (2X Kapa  
40 Hotstart Ready mix, VWR, 15 cycles). cDNA libraries were tagmented and PCR amplified

1 (Nextera tagmentation kit, Illumina). Finally, libraries were pooled and sequenced  
2 (Illumina Nextseq 500, 20x130 bp). 2.6x10<sup>7</sup> to 3.7x10<sup>7</sup> sequencing reads were generated  
3 for the experiments described in Figure 2. 4.2x10<sup>7</sup> to 6.8x10<sup>8</sup> sequencing reads were  
4 generated for the experiments described in Figure 3.

5 **qPCR measurement of reverse transcription yield.** 80,000 L cells or 62,500 B cells  
6 were lysed in one mL of lysis buffer, and placed on ice for 15 minutes with brief vortexing  
7 every 3 minutes. After lysis and centrifugation (14,000 RPM for 15 minutes at 4°C), the  
8 supernatant was transferred to a tube containing 12,000 DART-seq beads. The bead and  
9 supernatant mixture was rotated at room temperature for 15 minutes and then rinsed  
10 twice with 1 mL 6x SSC. Reverse transcription, endonuclease treatment, and cDNA  
11 amplification steps performed as described above, with the exception that all reagent  
12 volumes were decreased by 80%. Following cDNA amplification and cleanup (following  
13 manufacturer's instructions, Beckman Coulter Ampure beads), the total yield of cDNA  
14 was measured (Qubit 3.0 Fluorometer, HS DNA).

15 **qPCR measurements of amplicon enrichment in sequencing libraries.** 0.1 ng DNA  
16 from sequencing libraries was used per qPCR reaction. Each reaction was comprised of  
17 1 µL cDNA (0.1 ng/µL), 10 µL of iTaq™ Universal SYBR® Green Supermix (Bio-Rad),  
18 0.5 µL of forward primer (10 µM), 0.5 µL of reverse primer (10 µM) and 13 µL of DNase,  
19 RNAse free water. Reactions were performed in a sealed 96-well plate using the following  
20 program in the Bio-Rad C1000 Touch Thermal Cycler: (1) 95 °C for 10 minutes, (2) 95 °C  
21 for 30 seconds, (3) 65 °C for 1 minute, (4) plate read in SYBR channel, (5) repeat steps  
22 (2)-(4) 49 times, (6) 12 °C infinite hold. The resulting data file was viewed using Bio-Rad  
23 CFX manager and the Cq values were exported for further analysis. Each reaction was  
24 performed with two technical replicates.

25 **Fluorescence hybridization assay.** Roughly 6,000 DART-seq beads were added to a  
26 mixture containing 18 µL of 5M NaCl, 2 µL of 1M Tris HCl pH 8.0, 1 µL of SDS, 78 µL of  
27 water, and 1 µL of 100 µM Cy5 fluorescently labeled oligo (see Supplementary Table).  
28 The beads were incubated for 45 minutes at 46 °C in an Eppendorf ThermoMixer C (15",  
29 at 1800 RPM). Following incubation, the beads were pooled and washed with 250 µL TE-  
30 SDS, followed by 250 µL TE-TW. The beads were suspended in water and imaged in the  
31 Zeiss Axio Observer Z1 in the Cy5 channel and bright field. A custom Python script was  
32 used to determine the fluorescence intensity of each bead.

33 **Fluorescence hybridization assay to determine ligation efficiencies.** Roughly 3,000  
34 DART-seq beads were added to a mixture containing 18 µL of 5M NaCl, 2 µL of 1M Tris  
35 HCl pH 8.0, 1 µL of SDS, 78 µL of water, and 1 µL of 100 µM Cy5 fluorescently labeled  
36 oligo (see Supplementary Table). The beads were incubated for 45 minutes at 46 °C in  
37 an Eppendorf ThermoMixer C (15", at 1800 RPM). Following incubation, the beads were  
38 pooled and washed with 250 µL TE-SDS, followed by 250 µL TE-TW. The beads were  
39 suspended in 200 µL of DNase/RNase free water and transferred to a Qubit assay tube  
40 (ThermoFisher Scientific, Q32856). Qubit 3.0 Fluorometer was set to "Fluorometer" mode

1 under the “635 nm” emission setting. The tube was vortexed briefly and placed in the  
2 fluorometer for immediate readout. Two additional vortexing and measurement steps  
3 were performed.

4 **Single cell host transcriptome profiling.** We used previously described bioinformatic  
5 tools to process raw sequencing reads<sup>2</sup>, and the Seurat package for downstream  
6 analysis<sup>19</sup>. Cells with low overall expression or a high proportion of mitochondrial  
7 transcripts were removed. For clustering, we used principal component analysis (PCA),  
8 followed by k-means clustering to identify distinct cell states. For meta-clustering, host  
9 expression matrices from all four experiments were merged using Seurat. Cells with fewer  
10 than 2000 host transcripts were excluded from the analysis in Figure 2. Cells with fewer  
11 than 100 unique genes detected were excluded from the analysis in Figure 3.

12 **Viral genotype analysis.** Sequencing reads that did not align to the host genome were  
13 collected and aligned to the T3D reovirus genome<sup>38</sup> (GenBank Accession EF494435-  
14 EF494445). Aligned reads were tagged with their cell barcode and sorted. The per-base  
15 coverage across viral gene segments was computed (Samtools<sup>39</sup> depth). Positions where  
16 the per-base coverage exceeded 50, and where a minor allele with frequency greater  
17 than 10% was observed, were labeled as SNV positions. The frequency of SNVs was  
18 calculated across all cells. For the combined host virus analysis, the host expression  
19 matrix and virus alignment information were merged. The per-base coverage of the viral  
20 genome was normalized by the number of host transcripts. Cells with fewer than 1500  
21 host transcripts were excluded from the analysis.

22 **Immunoglobulin identification and analysis.** Sequences derived from B cells were  
23 collected and aligned to a catalog of human germline V, D, J and C gene sequences using  
24 MiXCR version 2.1.5<sup>23</sup>. For each cell, the top scoring heavy and light chain variable  
25 regions were selected for subtyping and pairing analyses (Fig. 3e and Fig. 3g).

26 **Sigmoidal fitting heavy/light chain capture.** The mapping for the fractions of B cells  
27 containing heavy chains or light chains was fit with the following sigmoidal function:

28 
$$f(x) = \frac{1}{1 + e^{-b/(x-c)}} .$$

29 Where the parameter b was a free parameter for the fit of the light chain or heavy chain  
30 data, and then fixed for the light chain only, heavy chain only, and combined light chain  
31 and heavy chain data.

32 **Statistical analysis.** Statistical tests were performed in R version 3.3.2. Groups were  
33 compared using the two-tailed nonparametric Mann-Whitney U test.

34

### 35 **DATA AVAILABILITY**

36 Raw sequencing data and corresponding gene expression matrices have been made  
37 available: NCBI Gene Expression Omnibus; Project ID GSE113675.

38

### 39 **CODE AVAILABILITY**

40 Custom scripts are available at: <https://github.com/pburnham50/DART-seq>.

1  
2  
3  
4  
5  
6  
7  
8  
9  
10  
11  
12  
13  
14  
15  
16  
17  
18  
19  
20  
21  
22  
23  
24  
25  
26  
27  
28  
29  
30  
31  
32  
33  
34  
35  
36  
37  
38  
39  
40  
41  
42  
43

## ACKNOWLEDGMENTS

We would like to thank the De Vlaminck and Danko laboratory members for insightful discussions. We thank Peter Schweitzer and his colleagues at the Cornell University Biotechnology Resource Center (BRC) for performing the sequencing. This work was supported by US National Institute of Health (NIH) grant 1DP2AI138242 to IDV and National Science Foundation Graduate Research Fellowship Program (NSF-GRFP) grant DGE-1144153 to PB.

## COMPETING FINANCIAL INTERESTS

The authors declare no competing financial interests.

## AUTHOR CONTRIBUTIONS

PB, MS, CGD, JSLP and IDV designed the study. PB, MS, SHK, MH, PML and MMH carried out the experiments. PB, MS, MFZW and IDV analyzed the data. PB, MS and IDV wrote the manuscript. All authors provided comments and edits.

## REFERENCES

1. Shapiro, E., Biezuner, T. & Linnarsson, S. Single-cell sequencing-based technologies will revolutionize whole-organism science. *Nat. Rev. Genet.* **14**, 618 (2013).
2. Macosko, E. Z. *et al.* Highly Parallel Genome-wide Expression Profiling of Individual Cells Using Nanoliter Droplets. *Cell* **161**, 1202–1214 (2015).
3. Gierahn, T. M. *et al.* Seq-Well: portable, low-cost RNA sequencing of single cells at high throughput. *Nat. Methods* **14**, 395–398 (2017).
4. Klein, A. M. *et al.* Droplet barcoding for single-cell transcriptomics applied to embryonic stem cells. *Cell* **161**, 1187–1201 (2015).
5. Zheng, G. X. Y. *et al.* Massively parallel digital transcriptional profiling of single cells. *Nat. Commun.* **8**, 14049 (2017).
6. Xu, J. L. & Davis, M. M. Diversity in the CDR3 region of V(H) is sufficient for most antibody specificities. *Immunity* **13**, 37–45 (2000).
7. Gansauge, M.-T. *et al.* Single-stranded DNA library preparation from highly degraded DNA using T4 DNA ligase. *Nucleic Acids Res.* **45**, e79 (2017).
8. Dolan, P. T., Whitfield, Z. J. & Andino, R. Mapping the Evolutionary Potential of RNA Viruses. *Cell Host Microbe* **23**, 435–446 (2018).
9. Zanini, F., Pu, S.-Y., Bekerman, E., Einav, S. & Quake, S. R. Single-cell transcriptional dynamics of flavivirus infection. *Elife* **7**, e32942 (2018).
10. Russell, A. B., Trapnell, C. & Bloom, J. D. Extreme heterogeneity of influenza virus infection in single cells. *Elife* **7**, e32303 (2018).
11. Steuerma, Y. *et al.* Dissection of Influenza Infection In Vivo by Single-Cell RNA Sequencing. *Cell Syst.* **6**, 679–691.e4 (2018).

- 1 12. Zanini, F. *et al.* Virus-inclusive single cell RNA sequencing reveals molecular  
2 signature predictive of progression to severe dengue infection. *bioRxiv* (2018). at  
3 <<http://biorxiv.org/content/early/2018/08/09/388181.abstract>>
- 4 13. Patton, J. T. & Spencer, E. Genome replication and packaging of segmented  
5 double-stranded RNA viruses. *Virology* **277**, 217–25 (2000).
- 6 14. Joklik, W. K. Structure and function of the reovirus genome. *Microbiol. Rev.* **45**,  
7 483–501 (1981).
- 8 15. Niavarani, A. *et al.* APOBEC3A Is Implicated in a Novel Class of G-to-A mRNA  
9 Editing in WT1 Transcripts. *PLoS One* **10**, e0120089 (2015).
- 10 16. Harris, R. S. & Dudley, J. P. APOBECs and virus restriction. *Virology* **479–480**,  
11 131–145 (2015).
- 12 17. Parker, J. S. L., Broering, T. J., Kim, J., Higgins, D. E. & Nibert, M. L. Reovirus  
13 Core Protein  $\mu 2$  Determines the Filamentous Morphology of Viral Inclusion Bodies  
14 by Interacting with and Stabilizing Microtubules. *J. Virol.* **76**, 4483 LP-4496  
15 (2002).
- 16 18. Ooms, L. S., Jerome, W. G., Dermody, T. S. & Chappell, J. D. Reovirus  
17 Replication Protein  $\mu 2$  Influences Cell Tropism by Promoting Particle Assembly  
18 within Viral Inclusions. *J. Virol.* **86**, 10979 LP-10987 (2012).
- 19 19. Satija, R., Farrell, J. A., Gennert, D., Schier, A. F. & Regev, A. Spatial  
20 reconstruction of single-cell gene expression data. *Nat. Biotechnol.* **33**, 495–502  
21 (2015).
- 22 20. Georgiou, G. *et al.* The promise and challenge of high-throughput sequencing of  
23 the antibody repertoire. *Nat. Biotechnol.* **32**, 158–68 (2014).
- 24 21. DeKosky, B. J. *et al.* In-depth determination and analysis of the human paired  
25 heavy- and light-chain antibody repertoire. *Nat. Med.* **21**, 86–91 (2015).
- 26 22. Vollmers, C., Sit, R. V., Weinstein, J. A., Dekker, C. L. & Quake, S. R. Genetic  
27 measurement of memory B-cell recall using antibody repertoire sequencing. *Proc.*  
28 *Natl. Acad. Sci. U. S. A.* **110**, 13463–13468 (2013).
- 29 23. Bolotin, D. A. *et al.* MiXCR: software for comprehensive adaptive immunity  
30 profiling. *Nat. Methods* **12**, 380–1 (2015).
- 31 24. van der Maaten, L. & Hinton, G. E. Visualizing data using t-SNE. *J. Mach. Learn.*  
32 **9**, 2579–2605 (2008).
- 33 25. Kaminski, D., Wei, C., Qian, Y., Rosenberg, A. & Sanz, I. Advances in Human B  
34 Cell Phenotypic Profiling. *Frontiers in Immunology* **3**, 302 (2012).
- 35 26. Smith, K. *et al.* Antigen nature and complexity influence human antibody light  
36 chain usage and specificity. *Vaccine* **34**, 2813–2820 (2016).
- 37 27. Abe, M. *et al.* Differences in kappa to lambda ( $\kappa:\lambda$ ) ratios of serum and urinary  
38 free light chains. *Clin. Exp. Immunol.* **111**, 457–462 (1998).
- 39 28. Barandun, S. Immunsustitution BT - 84. Kongreß. in (ed. Schlegel, B.) 481–490  
40 (J.F. Bergmann-Verlag, 1978).
- 41 29. Kugelberg, E. Making sense in humans. *Nat. Rev. Immunol.* **15**, 133 (2015).
- 42 30. Mroczek, E. S. *et al.* Differences in the composition of the human antibody  
43 repertoire by B cell subsets in the blood. *Front. Immunol.* **5**, 96 (2014).
- 44 31. DeKosky, B. J. *et al.* Large-scale sequence and structural comparisons of human  
45 naive and antigen-experienced antibody repertoires. *Proc. Natl. Acad. Sci.* **113**,  
46 E2636 LP-E2645 (2016).



- 1 32. Lavinder, J. J., Hoi, K. H., Reddy, S. T., Wine, Y. & Georgiou, G. Systematic  
2 Characterization and Comparative Analysis of the Rabbit Immunoglobulin  
3 Repertoire. *PLoS One* **9**, e101322 (2014).
- 4 33. DeKosky, B. J. *et al.* High-throughput sequencing of the paired human  
5 immunoglobulin heavy and light chain repertoire. *Nat. Biotechnol.* **31**, 166–9  
6 (2013).
- 7 34. Lanzavecchia, A., Frühwirth, A., Perez, L. & Corti, D. Antibody-guided vaccine  
8 design: identification of protective epitopes. *Curr. Opin. Immunol.* **41**, 62–67  
9 (2016).
- 10 35. Karlsson Hedestam, G. B., Guenaga, J., Corcoran, M. & Wyatt, R. T. Evolution of  
11 B cell analysis and Env trimer redesign. *Immunol. Rev.* **275**, 183–202 (2017).
- 12 36. Jiang, N. Immune engineering: from systems immunology to engineering  
13 immunity. *Curr. Opin. Biomed. Eng.* **1**, 54–62 (2017).
- 14 37. Weinstein, J. A., Zeng, X., Chien, Y.-H. & Quake, S. R. Correlation of Gene  
15 Expression and Genome Mutation in Single B-Cells. *PLoS One* **8**, e67624 (2013).
- 16 38. Kobayashi, T. *et al.* A plasmid-based reverse genetics system for animal double-  
17 stranded RNA viruses. *Cell Host Microbe* **1**, 147–57 (2007).
- 18 39. Li, H. *et al.* The Sequence Alignment/Map format and SAMtools. *Bioinformatics*  
19 **25**, 2078–2079 (2009).
- 20
